# Supplementary material
Source: publisher site journal article supplement (https://www.degruyterbrill.com/publication/journal_key/CONOP/downloadAsset/CONOP_LaTex%20Template.zip)

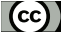

**BY-NC-ND**

Supplement: Supplementary file 1 [file by-nc-nd.pdf › by-nc-nd.pdf]
